# Supplementary material
Source: PubMed Central journal article supplement (PMC3716189)

## 1 **SUPPLEMENTARY MATERIAL**

### 3 **FIGURE LEGENDS**

5 **S1: SEVI enhances phagocytic uptake of bacteria by primary monocyte-derived**  
6 **macrophages: representative flow data.** *S. aureus* or *E. coli* labeled with pHrodo  
7 (Invitrogen) were mixed with SEVI fibrils (SEVI) or buffer alone, and then incubated with  
8 primary human monocyte-derived macrophages (MDM). As controls, cells were also  
9 incubated with SEVI fibrils alone (in the absence of bacteria). After 1 hr, cells were  
10 harvested and flow cytometric analysis of bacterial uptake performed; in control  
11 experiments, cells were treated with Cytochalasin-D to confirm that bacterial uptake was  
12 due to phagocytosis. **(A, B)** Flow histograms from representative experiments in which  
13 MDM were incubated with fluorescent intracellular bacteria are shown, respectively, for  
14 cells exposed to *E. coli* or *S. aureus* ( $\pm$  SEVI). Numbers within the boxes represent the  
15 percentage of cells staining positively for intracellular bacteria. In each panel, the lower  
16 set of plots denotes cells that were pretreated with Cytochalasin D, prior to being  
17 incubated with bacterial particles ( $\pm$  SEVI).

19 **S2: SEVI fibrils, but not the monomeric PAP<sub>248-286</sub> peptide, enhances phagocytic**  
20 **uptake of bacteria by primary monocyte-derived macrophages.** *E. coli* labeled with  
21 pHrodo (Invitrogen) was mixed with monomeric PAP<sub>248-286</sub> peptide (monomer), SEVI  
22 fibrils (SEVI) or buffer alone, and then incubated with MDM. As controls, cells were also

1 incubated with SEVI fibrils and monomeric peptide alone (in the absence of bacteria).  
2 After 1 hr, cells were harvested and flow cytometric analysis of bacterial uptake  
3 performed. Plots from a representative experiment are shown. Numbers within the  
4 boxes represent the percentage of cells staining positively for intracellular bacteria. The  
5 lower set of plots denotes cells that were pretreated with Cytochalasin D (Cyto-D), prior  
6 to being incubated with bacterial particles ( $\pm$  monomeric PAP<sub>248-286</sub> peptide or SEVI).

7

8 **S3: SEVI fibril, but not the monomeric PAP<sub>248-286</sub> peptide, enhances the binding of**  
9 **bacteria to primary monocyte-derived macrophages.** *E. coli* labeled with FITC  
10 (Invitrogen) were incubated with SEVI fibrils or buffer alone, and then incubated with  
11 MDM that were pretreated with the phagocytosis inhibitor Cytochalasin D. After 1 hr,  
12 cells were harvested and flow cytometric analysis of bacterial binding to the cell surface  
13 was performed. Plots are representative of 3 independent experiments, each performed  
14 with cells from a different donor.

# Suppl. Fig 1

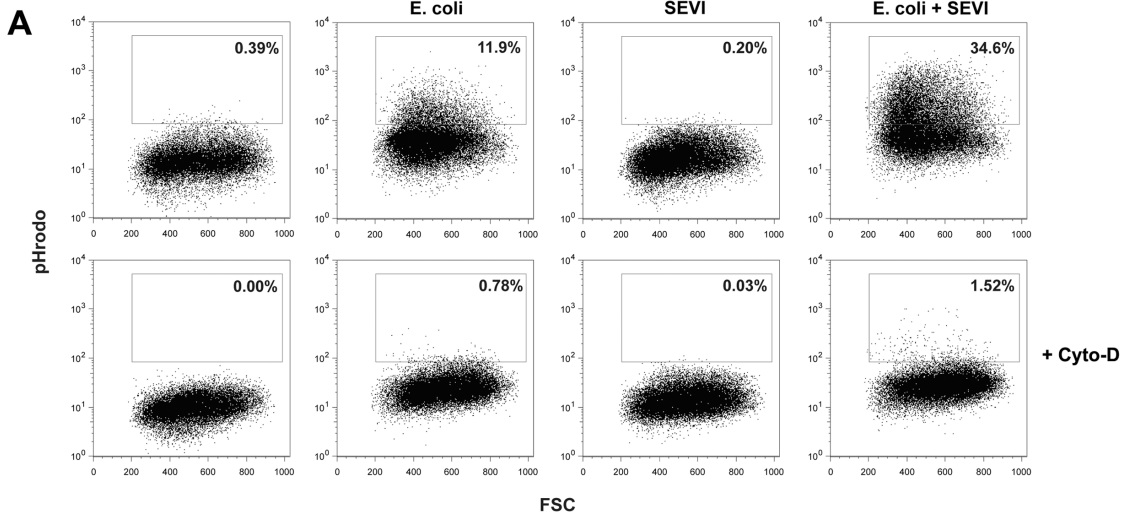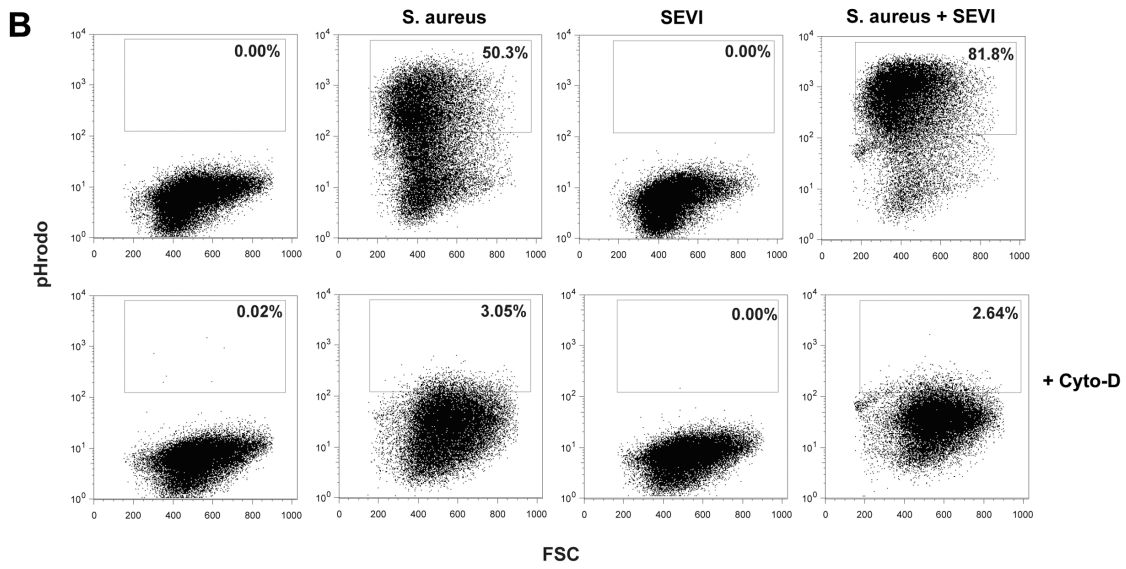

Suppl. Fig 2

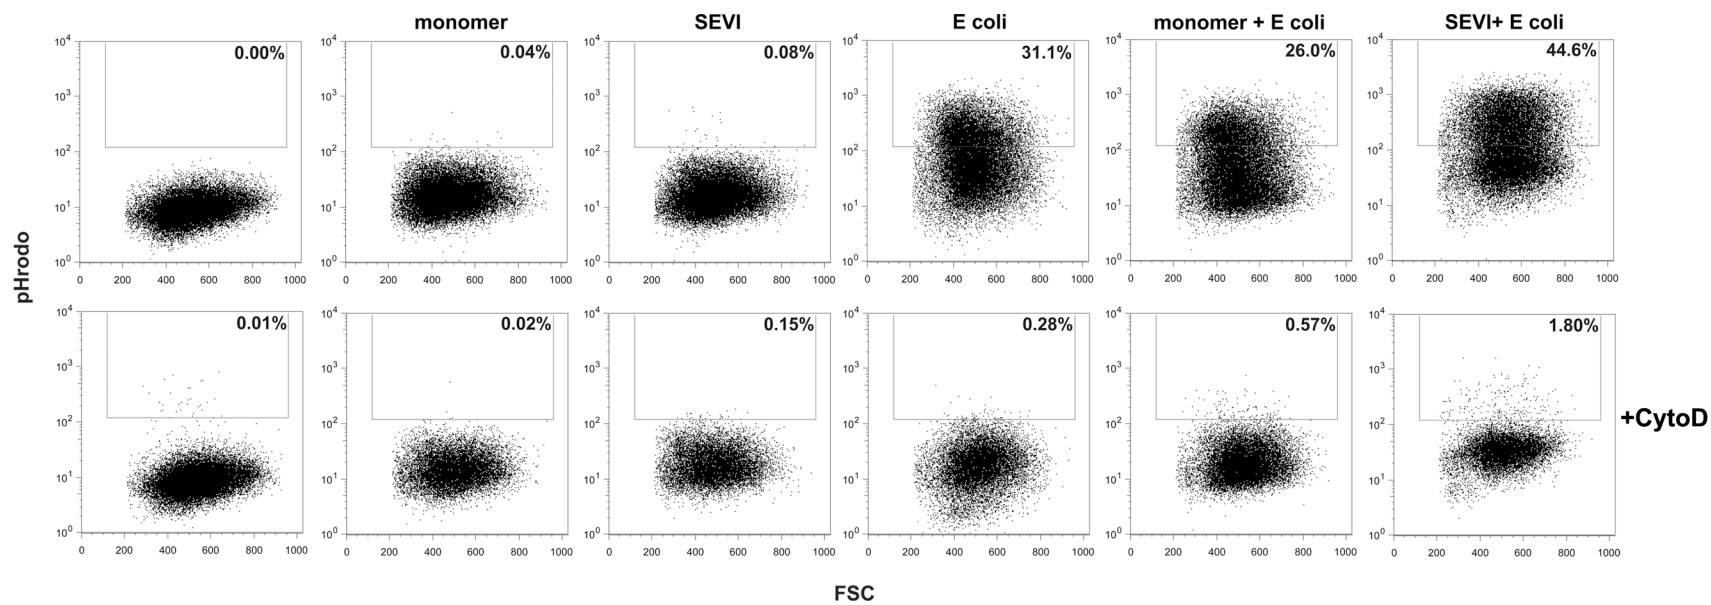

Suppl Fig 3

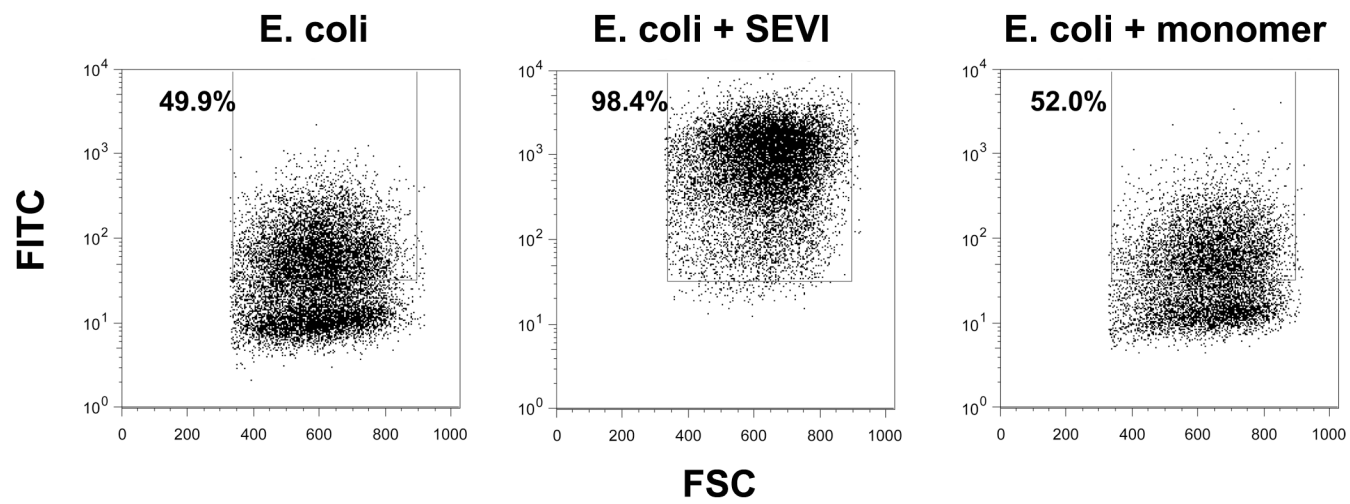

Supplement: AAC.02464-12_zac999101841so1.pdf [file AAC.02464-12_zac999101841so1.pdf]
